# Supplementary material for: Key Considerations in the Design of a Sentinel Network for Drug Use: Qualitative Findings
Source: Research Square preprint supplement (doi:10.21203/rs.3.rs-8165107/v1), 2025-12-15
Supplement: Supplementary file 1 [file 4652cdb23654a41a3b8f11b3.docx]

**SUPPLEMENTARY MATERIAL**

**Key Considerations in the Design of a Sentinel Network**

**for Drug Use: Qualitative Findings**

Sara Esteves Araujo Correia, Leonor Varela-Lema, Linda B. Cottler, Jasjit S. Ahluwalia, Angela J. Torres Inglesias, Mónica Perez-Rios

**Annex 1: Interviews and Focus Groups Guide**

**Key Considerations in the Design of a Sentinel Network for Addictions**

**FG 1 and Interview 1&2**

| **OBJECTIVES** | **MAIN QUESTIONS** | **OTHER POSSIBLE QUESTIONS** |
| --- | --- | --- |
| 1. **Definition of an Alert** | How would you define an alert in the context of illegal drug surveillance?  In your experience, how would a priority alert differ from other less urgent information | What would you understand by an alert related to drug use? And what conditions should it meet in order to truly prevent harm or trigger a rapid response?  What criteria should govern the triggering of an alert and the institutional response? |
| 2. **Identification of the One Responsible for Alert Management** | Which agencies or departments should be responsible for managing alerts?  How could collaboration be coordinated across different levels of administration (local, regional, national, European)? | Are there any existing administrative structures that could take on this role?  What barriers might there be to agencies or departments taking charge of alerts? |
| 3. **Platforms and Tecnological Tools** | What platforms or systems are currently used for monitoring and surveillance in public health issues (influenza, EU-level projects)? | Could these platforms be adapted for the sentinel network?  What would be the advantages and disadvantages of adapting existing networks versus using new systems? |
| 4. **Management and Response Mechanisms** | How should alert information be managed/organized in administrative terms?  How would the response be coordinated with the different administrative levels involved? | How should alerts be transmitted within the network? How often should they ideally be updated (e.g. in real time, weekly, only in critical situations)? |
| 5. **Interest and Possibility of Integration into Existing Services** | Do you think it would be feasible to incorporate a notification or alert system for addictive behaviors into the services or resources that already exist in your institution?  Could EU-level institutions (e.g. EUDA) play a role in supporting or promoting the implementation of sentinel networks at regional or national level? | What are the next steps needed to move forward with this proposal?  Could such collaboration build on existing structures or experiences (e.g. EURO-DEN)? |
| 6**. Facilitators and Barriers** | What benefits and challenges do you identify in its implementation?  What would be the main challenges (political, institutional, technical, legal, etc.)? How can the involvement and commitment of local and regional institutions be ensured? | If a new system were to be considered, what barriers do you think could difficult its implementation, whether technological, legal, or otherwise? |

**FG2**

| **OBJECTIVES** | **MAIN QUESTIONS** | **OTHER POSSIBLE QUESTIONS** |
| --- | --- | --- |
| 1 **Artificial Inteligence (AI) and Barriers** | What potential do you see in AI for detecting consumption patterns or the emergence of new substances in real time?  Based on your experience, what specific benefits would AI bring to the monitoring of illegal drugs? | How could AI help prioritize alerts or differentiate the most urgent ones? |
| 2. **Management and Responsable Parties** | What role should healthcare professionals play in validating or supervising automatically generated alerts?  How should the interaction between AI-generated alerts and institutional response be structured? | What ethical criteria should be taken into account in AI-assisted decision-making?  What kind of training or support do you consider necessary for staff to be able to interpret alerts correctly and make decisions based on them? |
| 3. **Platforms and Integration into Existing Services** | Are there any technological platforms already in use in public health that could be adapted to incorporate AI into this network? | What kind of data would be needed to train the AI platforms for this network? |
| **4. Facilitators** | What resources would be necessary to facilitate the effective implementation of artificial intelligence-based tools in your professional context?  How could the long-term sustainability of such a system be ensured? |  |
| **5. General Barriers** | What technical, ethical, or legal barriers do you think could difficult the implementation of an AI component in the Sentinel Network? | How could they be anticipated or resolved? |

**FG 3 and Interview 3**

| **Topic/Theme** | **Questions** |
| --- | --- |
| **Network Organization** | How is collaboration structured between local focal points and the central NDEWS team?  Which types of informants have proven **most useful** for detecting early signals (hospitals, police, forensic units, users, etc.)? |
| **Detection of Emerging Trends** | What criteria do you use to decide when a signal should escalate into a formal alert?  What indicators or methods help you identify that a new trend might be developing? |
| **Use of Digital and Traditional Sources** | Which digital tools have been the most useful for early warning?  How do you combine traditional sources (hospital reports, biospacial) with digital sources (social media monitoring, webscraping)?  How do you validate information coming from informal digital sources? |
| **Integration of Qualitative and Quantitative Data** | How do you integrate qualitative data (e.g., narratives, observations) with quantitative epidemiological data?  What best practices would you recommend for integrating these two types of data in an early warning system? |
| **Key Success Factors and Barriers** | Based on your experience, what have been the main facilitators to maintain a functional and responsive network?  What barriers (e.g., institutional, legal, technical) have you encountered when implementing sentinel surveillance? |
| **Network Sustainability and Motivation** | How do you maintain the engagement of your informants over time?  Do you use any strategies like regular meetings, feedback mechanisms, or incentives to support sustained participation? |
| **Recommendations for our network** | Based on your experience, what **three key** **recommendations** would you give for designing and sustaining a successful sentinel surveillance system focused on drug use trends and determinants? |

**Interview 4**

| **OBJECTIVES** | **MAIN QUESTIONS** | **OTHER POSSIBLE QUESTIONS** |
| --- | --- | --- |
| 1. **Definition of an Alert** | What is the difference between a regional signal and an alert that must be circulated nationally?  What conditions must be met to activate a national alert from local signals? | How could a community-based sentinel network contribute to strengthening or complementing the current alert system?  What kind of qualitative signals could be useful for SEAT (Spanish Early Warning System) or OEDA (Spanish Drug Observatory)? |
| 2. **Identification of the One Responsible for Alert Management** | Is there a pre-existing institutional channel for an autonomous community to send signals that reach other autonomous communities?  How could feedback be guaranteed to the community that generates the alert? | Which structures would be responsible for this sentinel alerts redistribution (SEAT, OEDA, PNSD)? |
| 3. **Platforms and Tecnological Tools** | Would it be feasible to incorporate data from a regional sentinel network into existing PNSD (National Spanish Drug Plan) digital platforms?  Could a two-way channel be implemented between SEAT and regional networks? | Which channel do you consider most feasible: structured mail, online form, proprietary application, etc?  If a new system is being considered, what barriers do you think could hinder its implementation, whether technological, legal, or otherwise? |
| 4. **Management and Response Mechanisms** | How is alert management organized in the PNSD when information is received from a community?  How would the response be coordinated with the different administrative levels involved? | How often should signals be reviewed to ensure timely response?  What political or technical barriers should be addressed from the outset? |
| 5. **Interest and Possibility of Integration into Existing Services** | Do you think it is feasible for a regional sentinel network to be integrated into the SEAT or PNSD? What conditions or requirements would be necessary to formalize this integration?  What institutional incentives could facilitate this process (agreements, protocols, pilot projects, etc.)? | Do you have three key recommendations for our network?  What steps would you recommend to move towards a pilot test of collaboration between SEAT and the regional network? |
